# Supplementary material for: Access 3 project protocol: young people and health system navigation in the digital age: a multifaceted, mixed methods study
Source: PubMed Central journal article supplement — BMJ Open. 2017 Aug 7;7(8):e017047. doi: 10.1136/bmjopen-2017-017047 (PMC5724235; doi:10.1136/bmjopen-2017-017047), 2017-08-07
Supplement: bmjopen-2017-017047.draft_revisions.pdf [file bmjopen-2017-017047.draft_revisions.pdf]

# BMJ Open

BMJ Open is committed to open peer review. As part of this commitment we make the peer review history of every article we publish publicly available.

When an article is published we post the peer reviewers' comments and the authors' responses online. We also post the versions of the paper that were used during peer review. These are the versions that the peer review comments apply to.

The versions of the paper that follow are the versions that were submitted during the peer review process. They are not the versions of record or the final published versions. They should not be cited or distributed as the published version of this manuscript.

BMJ Open is an open access journal and the full, final, typeset and author-corrected version of record of the manuscript is available on our site with no access controls, subscription charges or pay-per-view fees (<http://bmjopen.bmj.com>).

If you have any questions on BMJ Open's open peer review process please email [editorial.bmjopen@bmj.com](mailto:editorial.bmjopen@bmj.com)

# BMJ Open

## Access 3 project protocol: young people and health system navigation in the digital age - a multi-faceted, mixed-methods study.

|                                 |                                                                                                                                                                                                                                                                                                                                                                                                                                                                                                                                                                           |
|---------------------------------|---------------------------------------------------------------------------------------------------------------------------------------------------------------------------------------------------------------------------------------------------------------------------------------------------------------------------------------------------------------------------------------------------------------------------------------------------------------------------------------------------------------------------------------------------------------------------|
| Journal:                        | <i>BMJ Open</i>                                                                                                                                                                                                                                                                                                                                                                                                                                                                                                                                                           |
| Manuscript ID                   | bmjopen-2017-017047                                                                                                                                                                                                                                                                                                                                                                                                                                                                                                                                                       |
| Article Type:                   | Protocol                                                                                                                                                                                                                                                                                                                                                                                                                                                                                                                                                                  |
| Date Submitted by the Author:   | 28-Mar-2017                                                                                                                                                                                                                                                                                                                                                                                                                                                                                                                                                               |
| Complete List of Authors:       | Kang, Melissa; University of Technology Sydney Faculty of Health, Public Health<br>Robards, Fiona; University of Sydney, General Practice<br>Sanci, Lena; University of Melbourne, Department of General Practice<br>Steinbeck, Katharine; Univ Sydney<br>Jan, Stephen; The George Institute for Global Health,<br>Hawke, Catherine; University of Sydney, Rural Clinical School<br>Kong, Marlene; University of New South Wales - Randwick Campus, The Kirby Institute<br>Usherwood, Tim; University of Sydney, General Practice; The George Institute for Global Health |
| <b>Primary Subject Heading</b>: | Public health                                                                                                                                                                                                                                                                                                                                                                                                                                                                                                                                                             |
| Secondary Subject Heading:      | Health services research, Health policy                                                                                                                                                                                                                                                                                                                                                                                                                                                                                                                                   |
| Keywords:                       | Public health < INFECTIOUS DISEASES, Quality in health care < HEALTH SERVICES ADMINISTRATION & MANAGEMENT, Health policy < HEALTH SERVICES ADMINISTRATION & MANAGEMENT, World Wide Web technology < BIOTECHNOLOGY & BIOINFORMATICS                                                                                                                                                                                                                                                                                                                                        |
|                                 |                                                                                                                                                                                                                                                                                                                                                                                                                                                                                                                                                                           |

SCHOLARONE™  
Manuscripts

1  
2  
3 **Title page**  
4

5  
6 *Access 3 project protocol: young people and health system navigation in the digital age -*  
7 *a multi-faceted, mixed-methods study.*  
8

9  
10  
11 **Melissa Kang (corresponding author)**

12 Associate Professor, Australian Centre for Public and Population Health Research, Faculty of  
13 Health, University of Technology Sydney, PO Box 123 Ultimo NSW 2007

14  
15 [melissa.kang@uts.edu.au](mailto:melissa.kang@uts.edu.au)

16  
17  
18 Tel: +612 9514 7986  
19

20  
21 **Fiona Robards**

22 Senior Research Officer, Department of General Practice, Sydney Medical School  
23 Westmead, The University of Sydney, Sydney, Australia  
24  
25

26  
27  
28 **Lena Sanci**

29 Deputy Head of Department, Department of General Practice  
30 The University of Melbourne, Melbourne, Australia  
31  
32

33  
34  
35 **Katharine Steinbeck**

36 Medical Foundation Chair in Adolescent Medicine  
37 Sydney Medical School, The University of Sydney, Sydney, Australia  
38  
39

40  
41 **Stephen Jan**

42  
43 **The George Institute for Global Health**

44 Global Office, Sydney, Australia  
45  
46

47  
48 **Catherine Hawke**

49 School of Rural Health, Sydney Medical School, The University of Sydney, Orange,  
50 Australia  
51  
52

53  
54  
55 **Marlene Kong**

56 Program Head, Aboriginal and Torres Strait Islander Health Program, The Kirby Institute,  
57 University of New South Wales, Sydney, Australia  
58  
59

1  
2  
3  
4  
5 **Tim Usherwood**

6 Head, Department of General Practice, Sydney Medical School Westmead, Sydney Australia

7  
8 Honorary Professorial Fellow, The George Institute for Global Health, Sydney, Australia  
9

10  
11  
12 **Keywords:** Adolescents, youth, health services accessibility, knowledge translation, health  
13  
14 policy  
15

16  
17 **Word Count 3897**  
18  
19  
20  
21  
22  
23  
24  
25  
26  
27  
28  
29  
30  
31  
32  
33  
34  
35  
36  
37  
38  
39  
40  
41  
42  
43  
44  
45  
46  
47  
48  
49  
50  
51  
52  
53  
54  
55  
56  
57  
58  
59  
60

## ABSTRACT

### Background:

The integration of digital technology into everyday lives of young people has become widespread. It is not known whether and how technology influences barriers and facilitators to health care, and whether and how young people navigate between face-to-face and virtual health care. To provide new knowledge essential to policy and practice we designed a study that would explore health system access and navigation in the digital age. The study objectives are to:

1. identify barriers and facilitators to health care for young people and how these vary between groups
2. describe experiences of young people accessing and navigating the health system in New South Wales (NSW), Australia
3. describe health system inefficiencies, particularly for young people who are marginalized
4. provide policy-relevant knowledge translation of the research data

### Methods and Analysis:

This mixed methods study has four parts, including: (1) a cross-sectional survey of young people (12 – 24 years) residing in NSW, Australia (2) a longitudinal, qualitative study of a subsample of marginalized young people (defined as young people who: identify as Aboriginal and/ or Torres Strait Islander; are experiencing homelessness; identify as sexuality and/ or gender diverse; are of refugee or vulnerable migrant background; and/ or live in rural or remote NSW) (3) interviews with professionals (4) a knowledge translation forum

### Ethics and Dissemination:

Ethics approvals were sought and granted. Data collection commenced in March 2016 and will continue until June 2017. This study will gather practice and policy-relevant intelligence

1  
2  
3 about contemporary experiences of young people and health services, with a unique focus on  
4  
5 five different groups of marginalised young people, documenting their experiences over time.  
6  
7 *Access 3* will explore navigation around all levels of the health system, determine whether  
8  
9 digital technology is integrated into this, and if so how, and will translate findings into  
10  
11 policy-relevant recommendations.  
12  
13  
14  
15  
16  
17  
18  
19  
20  
21  
22  
23  
24  
25  
26  
27  
28  
29  
30  
31  
32  
33  
34  
35  
36  
37  
38  
39  
40  
41  
42  
43  
44  
45  
46  
47  
48  
49  
50  
51  
52  
53  
54  
55  
56  
57  
58  
59  
60

For peer review only

## STRENGTHS AND LIMITATIONS

### Strengths

- Design allows for breadth and depth of enquiry about barriers, facilitators and health system navigation
- Stakeholder engagement assists with recruitment and interpretation of findings and policy relevance
- Policy translation as part of study design optimises incorporation into new youth health policy

### Limitations

- Potential for recruitment bias due to sampling strategies
- Inclusion criteria for marginalised groups study will not capture the full range of young people who are potentially marginalised.

## MANUSCRIPT

### BACKGROUND

The health and wellbeing of young people (12 – 24 years) are shaped by developmental factors unique to this period of life, as well as by a range of social, cultural and environmental determinants. Despite variability between and within countries, at a global level the health of young people has not improved over recent decades relative to other age groups.[1] In high income countries including Australia, mental health problems (including self-harm and suicide) and chronic physical illness are the major health conditions experienced by young people.[1, 2] Over the lifetimes of the current generation of young people digital technology has become integrated into everyday life. In Australia today almost 100% of young people have internet access, the majority have smartphones with internet access and most use mobile devices to access the internet.[3, 4]

Timely access to appropriate health care is an important determinant of young people's health and overall wellbeing. Treatment of acute and chronic health conditions, including mental health disorders, and preventive health care are all within the remit of health services. Health services also have the capacity to identify health risk behaviours and intervene early. A recent Australian study found that over 90% of young people (14 – 24 years) presenting to general practice carry at least one psychosocial health risk, and further, that engagement with the service mitigated some negative health trajectories. This study found that screening for health risk behaviours led to less illicit drug use and STI risk at three-months, and less risk for unplanned pregnancy at 12 month follow up. [5]

Hospitalised young people have developmental needs that require specific service delivery and policy responses. A USA study of patient safety in hospital showed that adolescents (13-



1  
2  
3 20 years) were significantly more likely to experience an adverse event in hospital compared  
4  
5 to younger children (0-12 years). Most of these were attributed to ‘adolescent-specific  
6  
7 factors’ such as social, emotional and cognitive development, legal minor status and  
8  
9 ‘discomfort with adolescents’ on the part of hospital staff.[6]  
10

11  
12  
13  
14 Young people with existing chronic health conditions transition into adolescence with needs  
15  
16 that can change abruptly and exacerbate health vulnerabilities. Health risk behaviours in this  
17  
18 population occur at similar or higher rates compared to their well peers. [7] Issues of  
19  
20 adherence and disengagement from health care are well reported and policy and  
21  
22 programmatic responses to transition care into adulthood have been established in many  
23  
24 countries including Australia.[8]  
25  
26

27  
28  
29 Orienting health services to respond effectively to the multilayered needs of young people  
30  
31 across the health system requires an understanding of developmentally and culturally  
32  
33 appropriate care. Despite evidence-based guidelines for ‘youth friendly’ health services,[9]  
34  
35 young people continue to have suboptimal experiences. A study across eleven developed  
36  
37 countries (including Australia) found that young adults (18 – 25 years) had worse satisfaction  
38  
39 with health services and significantly higher cost barriers compared to older adults. The  
40  
41 authors concluded that negative experiences were partially explained by complex health  
42  
43 system factors which could be amenable to policy or practice interventions.[10]  
44  
45  
46  
47

48  
49 In Australia, access to and models of health care were described in the 1990s – early 2000s  
50  
51 [11-13] and have directly informed youth health policy.[14,15] Despite these initiatives,  
52  
53 health care for young people has become more fragmented [16,17] and presentations to  
54  
55 Emergency Departments are increasing among this age group, possibly due to general  
56  
57  
58  
59  
60

1  
2  
3 practitioner (GP) unavailability and cost.[18] In the hospital sector in Australia, there is also  
4  
5 major scope to improve 'adolescent-friendliness'.[19]  
6  
7

8  
9  
10 Possibly the most significant societal change in the past decade has been the emergence of  
11  
12 digital technology as an integral part of life. Evidence is now needed to understand how  
13  
14 digital technology influences *access* to health care for young people generally, as well as  
15  
16 those with more complex or sensitive health needs or who might otherwise have difficulty  
17  
18 accessing health services. A recent systematic review suggested that online mental health  
19  
20 services in help-seeking for young people may play a small role in facilitating access.[20]  
21  
22 Online interventions may also help facilitate some access to sexual health care, particularly  
23  
24 STI screening.[21]  
25  
26

27  
28  
29 This current study will focus on groups of marginalised young people who often have  
30  
31 complex psychosocial needs, but whose access to health care has been less comprehensively  
32  
33 studied. For example, in the Access Phase 1 study,[22] only five out of 86 focus groups were  
34  
35 conducted with out-of-school young people who were experiencing homelessness. A recent  
36  
37 systematic review of homeless youth and healthcare access identified only 13 studies that  
38  
39 focused on homeless youth specifically. Two of these were in Australia and were small  
40  
41 qualitative studies.[23] The Access Phase 1 study included a substantial proportion of young  
42  
43 people living in rural and remote areas, and found cost, availability of provider, qualities  
44  
45 (such as female GPs), and confidentiality were more prominent barriers compared to those  
46  
47 expressed by urban young people.[24] A recent Australian study of sexuality and gender  
48  
49 diverse young people found that fear of discrimination and concerns about coming out to  
50  
51 health professionals were major barriers to optimal health care.[25] However this latter study  
52  
53 explored a broad range of experiences of young people in schools and communities, rather  
54  
55  
56  
57  
58  
59  
60

1  
2  
3 than their access to health care. Aboriginal and/ or Torres Strait Islanders and young people  
4  
5 of refugee background are two other groups whose access to health care has not been  
6  
7 comprehensively studied. There have been some recent Australian studies exploring access  
8  
9 among Indigenous young people [26] and young people of refugee background, [27] however  
10  
11 most have been cross-sectional qualitative studies and usually focusing on mental health care.  
12  
13

14  
15  
16 Finally, there is consistent evidence of failure for research to be translated into policy and  
17  
18 practice which not only reduces cost-effectiveness and efficiencies in health care but can also  
19  
20 lead to poorer health outcomes.[28] Embedded in our study design is a knowledge translation  
21  
22 process allowing the research findings to be shared, interpreted and discussed with key  
23  
24 stakeholders to directly shape policy and advocacy agendas on health care for young people.  
25  
26

27  
28  
29 This protocol describes a multi-faceted, mixed-methods study known as *Access 3*. It takes its  
30  
31 name from the previous research studies called Access Phase 1 [22] and Access Phase 2 [29]  
32  
33 and was funded by the state health department of New South Wales (NSW), Australia, in  
34  
35 2015 to gather policy-relevant intelligence about contemporary experiences of young people  
36  
37 and health services. *Access 3* aims to explore ways in which young people in NSW access,  
38  
39 navigate and experience all levels of the health system, how digital technology is integrated  
40  
41 into these processes, and to translate findings into practice and policy-relevant  
42  
43 recommendations.  
44  
45  
46  
47  
48

## 49 **METHODS AND ANALYSIS**

50  
51 The *Access 3* study objectives are to:

- 52  
53  
54 1. identify barriers and facilitators to accessing health care for young people in NSW  
55  
56 and how these vary between groups  
57  
58  
59  
60

2. describe experiences of young people accessing and navigating the health system in NSW
3. describe health system inefficiencies for young people who are marginalized
4. provide practice and policy-relevant knowledge translation of the research data

Marginalised young people will be defined as meeting at least one of the following criteria:

- Living in rural/ remote NSW
- Being homeless or at risk of homelessness (using the cultural definition) [30]
- Being of refugee background or a recently arrived migrant from a non-English speaking background
- Being Aboriginal and/or Torres Strait Islander
- Being same-sex attracted or identifying as gay, lesbian, bisexual, transgender, queer, intersex or asexual (GLBTQIA)

These five groups have been selected to provide a purposive and varied sample, and our inclusion criteria are not intended to represent an exhaustive classification of all marginalised young people. However, by exploring the needs of young people belonging to one or more of these groups, we may also gain insight into the experiences of marginalised young people more broadly.

*Access 3* comprises four separate but interconnected studies, illustrated in **Figure 1**.

### **Study One**

Aim: to describe and quantify barriers, facilitators, and how technology is used, to access health care, and how these vary by age, gender and marginalization

Design: cross-sectional survey

Participants: non-probability sample of young people 12 – 24 years residing in NSW with oversampling of marginalized young people

1  
2  
3 Recruitment: online and offline. Online recruitment has included targeted emails to youth  
4 relevant networks, social media (Facebook, Twitter, and Instagram) and opportunistic online  
5 promotion of the survey. Offline recruitment has occurred face-to-face in education-linked  
6 settings, youth accommodation services and forums where groups of young people meet (e.g.  
7 advocacy groups). To purposively sample marginalized young people, we have worked with  
8 networks and advocates from a range of organizations in rural areas, supported  
9 accommodation services, community organisations and services who work with or for  
10 homeless young people, sexuality diverse and gender diverse young people, Aboriginal and /  
11 or Torres Strait Islander young people, young people living in rural areas and young people  
12 of refugee or refugee like background. We have also relied on convenience and snowball  
13 sampling methods to achieve our sample size.

14  
15  
16  
17  
18  
19  
20  
21  
22  
23  
24  
25  
26  
27 Data collection: anonymous questionnaire administered via an online survey platform or by  
28 hardcopy. Data collection commenced in February 2016. The online survey was closed in  
29 February 2017, and hardcopy data collection is about to close as of March 2017. The  
30 questionnaire was guided by published evidence [22, 29, 31] about known barriers to access  
31 and ‘youth-friendliness’ indicators applicable to primary and community based health  
32 services and hospitals. Questions about the impact of digital technology on whether, when  
33 and how to access health care were included. Demographic data were collected, as well as the  
34 presence of chronic health conditions and/ or disability, and young people’s knowledge and  
35 attitudes to health services and accessing care. The questionnaire was developed in  
36 consultation with and piloted among a Youth Consultant group who also assisted with  
37 promotion of the survey. The questionnaire topic headings are listed in **Figure 2**.

38  
39  
40  
41  
42  
43  
44  
45  
46  
47  
48  
49  
50  
51  
52 Analysis: Quantitative analysis, using the statistical software program, SPSS,[32] of the  
53 barriers and facilitators and use of digital technology, encountered by age, gender, rurality,  
54 country of birth, Indigenous status, and homelessness, refugee status, cultural background  
55  
56  
57  
58  
59  
60

1  
2  
3 and same-sex attraction and/or identification as lesbian, gay, bisexual, transgender, queer,  
4  
5 intersex and/ or asexual.  
6

7  
8 Qualitative thematic analysis of free text responses, with the aid of the software program  
9  
10 NVivo,[33] will be undertaken to describe barriers and facilitators to access, use of digital  
11  
12 technology in help seeking, young people's understanding of the health system and the  
13  
14 influences on their decisions to access which services when.  
15

#### 16 Expected outcomes:

17  
18 The primary outcomes will be self-report:  
19

20  
21 - using yes/ no responses to a list of known barriers (awareness of services; confidentiality,  
22  
23 fear/ embarrassment; negative experiences; physical barriers including cost, transport,  
24  
25 availability of services, opening hours).  
26

27  
28 - of barriers and facilitators using Likert scale responses

29  
30 To report frequencies with a 95% confidence interval for non-marginalised young people and  
31  
32 any group of marginalised young people, and to be able to detect minimum clinically and  
33  
34 policy relevant differences in primary outcomes between groups we need approximately 350  
35  
36 respondents from each group. Our target sample size is 2100.  
37

38 Consent and Ethics: Completion of the survey will be deemed to be consent to participate.

39  
40 University of Sydney Human Research Ethics Committee approval 2015/874; NSW

41  
42 Aboriginal Health and Medical Research Council Ethics Committee approval 1142/15.  
43  
44

#### 45 **Study Two**

46  
47 Aim: to explore in depth the health service-related experiences of marginalized young people  
48  
49 over time, to quantify contact with health services in real time, and to describe inefficiencies  
50  
51 or foregone care.  
52

53  
54 Design: longitudinal, qualitative study using one-on-one semi-structured interviews  
55

56  
57 Participants: Young people who:  
58  
59  
60

1  
2  
3 1. belong to one or more of the marginalized groups and  
4  
5 2. have had contact with the health system in the previous six months which constitutes an  
6  
7 *index event*. The index event will be defined as: presentation to an Emergency Department,  
8  
9 discharge from hospital, contact with a hospital outpatient or community-based health service  
10  
11 for one or more of the following health conditions: mental health, drug and alcohol, sexual  
12  
13 health, physical harm or injury, chronic medical illness or disability. Having an index event  
14  
15 as an inclusion criterion will narrow the target population to include those young people  
16  
17 likely to need or want ongoing contact with the health system over the study period, which  
18  
19 will be important for studying system navigation.  
20  
21

22  
23 Recruitment: Participants will be recruited from the cross-sectional survey sample and  
24  
25 selected on the basis of answers to identifier questions in the survey. We will recruit five to  
26  
27 eight young people from each of the marginalized groups, noting that some young people  
28  
29 belong to more than one of those groups.  
30  
31

32 Data collection: we will conduct three to four interviews over six to 12 months with each  
33  
34 participant. These can be face-to-face, by telephone or Skype and will be audio-recorded and  
35  
36 transcribed. Interpreters will be used if needed and, if desired, a parent/ carer can be present  
37  
38 for participants under 14. Data collection commenced in March 2016 and will continue until  
39  
40 May/ June 2017. The interview schedule includes questions about experiences of each  
41  
42 contact with a health service as well as navigation through the health system over time  
43  
44 (referral processes, communication between services, support for follow up, understanding of  
45  
46 the health system). The role of technology in making contact with services and moving  
47  
48 around the health system will be explored. The 'health system' is defined broadly as any  
49  
50 service delivering health care, including online services, general practice, emergency  
51  
52 departments, allied health services, medical specialist services, pathology and imaging  
53  
54 services, pharmacy services (e.g. seeking advice from a pharmacist about medication), school  
55  
56  
57  
58  
59  
60

1  
2  
3 counselling services, hospital outpatient services, hospital admissions, and any other  
4  
5 community or hospital based services (youth health, mental health, headspace, drug and  
6  
7 alcohol, sexual health, Family Planning etc.). The interviews will be piloted among three to  
8  
9 five youth consultants to ensure that questions are clear and the schedule flows logically. The  
10  
11 interview schedule headings are listed in **Figure 3**.

12  
13  
14 Data analysis: quantitative analysis will be descriptive and count frequencies such as number  
15  
16 of encounters and number of services visited per participant over the study period. Interview  
17  
18 transcripts will be entered into NVivo to assist with data coding; thematic analysis will be  
19  
20 conducted to derive major and minor themes.

21  
22  
23 Expected outcomes: Number of service encounters and services accessed, referral patterns  
24  
25 (including self-referral), foregone access due to a range of barriers, adherence to medications  
26  
27 and follow-up care, experiences of health encounters and the young person's perceptions  
28  
29 about their health after each encounter. We will also describe areas of inefficiency in the  
30  
31 system (such as duplication of services, multiple providers, long waiting times for specialist  
32  
33 appointments, post-hospital discharge care) as well as examples of integration, coordination  
34  
35 and system efficiency.

36  
37  
38 Consent and Ethics: Signed, written consent will be obtained from all participants prior to  
39  
40 interviews. Parental consent was obtained for young people aged 12 and 13, in addition to  
41  
42 consent from the young person. University of Sydney Human Research Ethics Committee  
43  
44 approval 2015/971; NSW Aboriginal Health and Medical Research Council Ethics  
45  
46 Committee approval 1141/15.

### 47 48 49 **Study Three:**

50  
51  
52 Aim: to obtain the perspectives of professionals about how young people (12 – 24 years) in  
53  
54 NSW access and navigate the health system

55  
56  
57 Design: qualitative cross sectional study using one-on-one semi-structured interviews  
58  
59  
60



1  
2  
3 Participants: Health service managers and experienced clinicians with in-depth knowledge  
4  
5 about the health system and how it supports young people's access to health care, who can  
6  
7 provide key informant perspectives on health system navigation for 12 – 24 year olds in  
8  
9 NSW. The sampling frame is professionals from different sectors (health sector and non-  
10  
11 government organisations) and different levels of the health system (primary, secondary,  
12  
13 tertiary). A list of potential participants will be drawn from existing networks and contacts of  
14  
15 the *Access 3* study investigator and reference groups. Data collection commenced in June  
16  
17 2016 and will be completed by May 2017.

18  
19  
20 Recruitment: direct approach by email

21  
22 Data collection: face to face or telephone interviews which will be audio-recorded and  
23  
24 transcribed. The interview schedule includes questions about barriers to care for young  
25  
26 people, health system integration and coordination, and client-centred care. Content and  
27  
28 themes derived from early young people interviews in Study 2 will be explored with the  
29  
30 professionals where relevant or appropriate. Interviews were piloted among two to three  
31  
32 Reference Group professional members to check for clarity and flow. Interview schedule  
33  
34 headings are listed in **Figure 4**.

35  
36  
37 Data analysis: Interview transcripts will be entered into NVivo to assist with data coding;  
38  
39 content and thematic analysis will be conducted to derive major and minor themes.

40  
41  
42 Expected outcomes: complementarity/ triangulation of data from Study 2; contrasting  
43  
44 perspectives between young people and professionals, practice or program examples and  
45  
46 recommendations that may inform policy.

47  
48  
49 Consent and Ethics: Signed, written consent will be obtained from all participants prior to  
50  
51 interviews. University of Sydney Human Research Ethics Committee approval 2016/232;  
52  
53 NSW Aboriginal Health and Medical Research Council Ethics Committee approval 1175/16.

## Study Four:

Aim: to translate synthesized data from Studies 1, 2 and 3 into policy-ready recommendations

Design: one-day facilitated workshop with stakeholders

Participants: young people, policy analysts, senior NSW Health staff, health managers, senior/ expert clinicians, researchers, other key stakeholders (e.g. community advocates)

Recruitment: direct approach by email

Data collection: small group discussions/ focus groups, recorded in writing. We will use a workshop framework informed by Lavis [34] and Grimshaw.[28] Lavis et al developed a framework for knowledge transfer which asks five key questions: 1. What should be transferred? 2. To whom should research knowledge be transferred? 3. By whom should research knowledge be transferred? 4. How should research knowledge be transferred? 5. With what effect should research knowledge be transferred?

Grimshaw et al extend this framework to suggest that knowledge translation strategies need to consider likely barriers and facilitators to optimize their success. The workshop was held on 21 November 2016 and presented preliminary data analysis from Studies 1, 2 and 3. The NSW health department requested that the workshop be conducted before the end of the year, due to the need to inform the youth health policy framework.

Data analysis: content and thematic analysis of group discussions

Expected outcomes: To provide NSW Health with concise policy recommendations for access to health care and health system navigation for youth health policy and advocacy.

Ethics: Not required

### Stakeholder engagement

Three strategies underpin the study's stakeholder engagement:

1. Involvement of young people

1  
2  
3 Youth participation [35] has been sought in several ways. A Youth Consultant committee was  
4  
5 convened for the life of the study to assist with design and piloting of instruments for Studies  
6  
7 1 and 2 and for promotion of the survey (Study 1). In addition youth representation was  
8  
9 sought on the study Reference Groups, and youth participants as key stakeholders at the  
10  
11 policy translation workshop.  
12

## 13 14 2. Structure of study governance and advisory teams

15  
16 Due to its complexity, five groups were convened to manage and guide the study. The *Chief*  
17  
18 *Investigator* team brings academic rigour and leadership to the research. An *Associate*  
19  
20 *Investigator* team brings a combination of academic, project management and network  
21  
22 expertise and will assist in some aspects of the research such as questionnaire and interview  
23  
24 design/ refinement, methods of recruitment, data analysis and dissemination. The *Youth*  
25  
26 *Consultant* committee provides ongoing advice to all aspects of the study. Two *Reference*  
27  
28 *Groups (Metropolitan and Rural)* have been convened to provide critical feedback on the  
29  
30 study at different stages. This group consists of stakeholders who will be invited to comment  
31  
32 on any aspects of the study but who may also be asked to assist with troubleshooting,  
33  
34 engagement with participants and policy translation. Policy makers are included on the  
35  
36 Reference Group.  
37  
38  
39

## 40 41 3. Direct engagement with policy makers

42  
43 Regular meetings have been scheduled over the study between representatives of the chief  
44  
45 investigator team and senior policy analysts and managers in NSW Health and the NSW  
46  
47 Youth Health Policy Reference group.  
48  
49  
50

## 51 52 **ETHICS AND DISSEMINATION**

53  
54 Given the multi-faceted design of this study, ethics approvals have been reported above  
55  
56 following the description of Methods and Analysis for each study component. In this study  
57  
58  
59  
60

1  
2  
3 we are exploring the health service access and navigation experiences of young people in a  
4  
5 generation where technology is integrated into daily life. This will provide new evidence, of  
6  
7 national and international relevance, for policy makers and practitioners charged with  
8  
9 improving the health of young people. To answer our research questions, we are employing  
10  
11 quantitative and qualitative research methods and have broad stakeholder and youth  
12  
13 engagement an integral component of the design.  
14  
15

16  
17  
18 The cross-sectional survey will provide for breadth of information-gathering across the youth  
19  
20 population in NSW and quantitative analysis of data. Online surveys promoted through social  
21  
22 media have the potential for wide reach, which is essential in a relatively short time frame.  
23  
24 The survey has identified potential participants for the longitudinal study, and survey data for  
25  
26 those participants will act as a springboard for the initial interviews. The longitudinal study is  
27  
28 exploring the young person's journey through all parts of the health system, and allows an  
29  
30 in-depth investigation into their navigation through the health system over time. There has  
31  
32 been very little longitudinal research into health system navigation generally.  
33  
34  
35

36  
37  
38 Our focus on subpopulations of marginalised young people is unique in its scope, since most  
39  
40 research into marginalised groups of young people tends to focus on only one group. By  
41  
42 targeting young people who are marginalised, we will also develop an understanding of how  
43  
44 the health system supports those with complex needs and where there might be inefficiencies  
45  
46 and gaps. This approach will enable comparison between groups and a better understanding  
47  
48 of relative inequities in access to health care and variation in their use of technology for  
49  
50 navigation of health services.  
51  
52  
53  
54  
55  
56  
57  
58  
59  
60

1  
2  
3 To understand structural issues and system inefficiencies more effectively, we are  
4  
5 interviewing professionals and service managers, whose perspectives are also important in  
6  
7 policy and practice translation. Key to our design therefore is the knowledge translation  
8  
9 component of the study. To extend our academic interpretations of new knowledge, we will  
10  
11 actively seek, document and translate our findings into policy- and practice- relevant  
12  
13 recommendations. Whilst we have a knowledge translation study as part of the research  
14  
15 design, we are incorporating knowledge translation theory [28, 34] into other aspects of the  
16  
17 study by involving stakeholders in formal reference groups and through academic  
18  
19 representation on the youth health policy advisory group. Feedback relating to new  
20  
21 knowledge will be sought from the research team. Simultaneously, members of the research  
22  
23 team will be involved in broader policy consultation. Together these actions will provide  
24  
25 substantial iterative processes to guide knowledge translation.  
26  
27  
28  
29  
30  
31

32 The main limitations of our study include the potential for recruitment bias due to our  
33  
34 sampling strategies. Although we aim to oversample young people from five marginalised  
35  
36 groups, we also want to include a broad cross-section of young people living in NSW in the  
37  
38 online survey. By recruiting participants through social media and stakeholder networks, we  
39  
40 will have a convenience rather than a representative sample of young people in NSW. Our  
41  
42 inclusion criteria for the longitudinal part of our study will not capture the full range of young  
43  
44 people who are potentially marginalised.  
45  
46  
47  
48  
49  
50

51 In conclusion, a collaborative and participatory ethos underpins our design and research  
52  
53 process. The study governance and support structure including young people and  
54  
55 stakeholders, will be assembled at the outset of the study and will guide all stages of the  
56  
57 study. By explicitly examining the use of digital technology as an integrated process in health  
58  
59  
60

1  
2  
3 seeking and health care, we will generate novel empirical evidence about access to health  
4 care that will inform clinical practice, health service management and policy makers.  
5  
6 Research outcomes can be used to focus policy and practice towards the alignment of  
7  
8 structures and processes which can target and reduce inequalities in health care access. The  
9  
10 ultimate objective is to improve health and well-being in vulnerable young people in NSW.  
11  
12

### 13 14 15 16 **Acknowledgments**

17 We would like to thank all our youth consultants, associate investigators, reference group  
18  
19 members for your active engagement and support of this study. We also thank Jessica Harper  
20  
21 who provided assistance with Ethics applications for Studies 1 and 2, technical help in  
22  
23 developing the online survey and general research administration support.  
24  
25  
26

### 27 28 29 **Competing Interests**

30 The authors declare that we have no competing interests.  
31  
32  
33  
34  
35

### 36 **Funding**

37 The *Access 3* study is funded by NSW Health. Representatives from the funding body are  
38  
39 members of the Project Reference Group. They have also been involved in planning the  
40  
41 knowledge translation one day workshop to ensure that policy relevant outcomes are  
42  
43 achieved.  
44  
45  
46  
47  
48

### 49 **Data sharing**

50 Data sharing is not applicable to this article; being a study protocol, as no datasets were  
51  
52 generated or analysed.  
53  
54  
55  
56  
57  
58  
59  
60

### Authors' contributions

MKang led the study design, wrote the tender for the grant, is the lead investigator, and wrote the draft for the protocol manuscript. FR is the project manager responsible for day to day conduct of the study and contributed to the literature review and manuscript. LS, KS, SJ, CH, MKong and TU contributed to the study design, provide research leadership to the study, and provided feedback on the manuscript. All authors read and approved the final manuscript.

### References

[1] Patton GC, Sawyer SM, Santelli JS, Ross DA, Afifi R, Allen NB, et al. Our future: a Lancet commission on adolescent health and wellbeing. *Lancet* 2016; 387: 2423–78.

[2] Australian Institute of Health and Welfare 2014. Australia's health 2014. Australia's health series no. 14. Cat. no. AUS 178. Canberra: AIHW.

[3] Australian Communications and Media Authority (ACMA). Aussie teens online: research snapshot. ACMA, 1 July 2014. Available at <http://www.acma.gov.au/theACMA/engage-blogs/engage-blogs/Research-snapshots/Aussie-teens-online> [Accessed 2 February 2017]

[4] Australian Communications and Media Authority (ACMA). Communications report 2013–14 series Report 1—Australians' digital lives. ACMA, March 2015. Available at <http://www.acma.gov.au/~media/Research%20and%20Analysis/Research/pdf/Australians%20digital%20livesFinal%20pdf.pdf> [Accessed 2 February 2017]

[5] Sanci LA, Chondros P, Sawyer SM, Pirkis J, Ozer E, Hegarty K, et al. Responding to young people's health risks in primary care: a cluster randomised trial of training clinicians in

1  
2  
3 screening and motivational interviewing. PLOS One 2015; doi:  
4  
5 10.1371/journal.pone.0137581.  
6  
7

8  
9  
10 [6] Woods DM, Holl JL, Klein JD, Thomas EJ. Patient safety problems in adolescent medical  
11  
12 care. J Adolesc Health 2006; 38:5-12.  
13

14  
15  
16 [7] Sawyer SM, Drew S, Yeo MS, Britto MT. Adolescents with a chronic condition:  
17  
18 challenges living, challenges treating. Lancet 2007; 369:1481–89.  
19  
20

21  
22  
23 [8] Wong LHL, Chan FWK, Wong FYY, Wong ELY, Huen KF, Yeoh EK, et al. Transition  
24  
25 care for adolescents and families with chronic illnesses. J Adolesc Health 2010; 47:540-546.  
26  
27

28  
29  
30 [9] World Health Organisation 2015. Global standards for quality health-care services for  
31  
32 adolescents: a guide to implement a standards-driven approach to improve the quality of  
33  
34 health care services for adolescents. Volume 1: Standards and criteria.  
35  
36 [http://apps.who.int/iris/bitstream/10665/183935/1/9789241549332\\_vol1\\_eng.pdf](http://apps.who.int/iris/bitstream/10665/183935/1/9789241549332_vol1_eng.pdf). [Accessed  
37  
38 21 December 2016]  
39  
40

41  
42  
43 [10] Hargreaves DS, Greaves F, Levay C, Mitchell I, Koch U, Esch T, et al. Comparison of  
44  
45 health care experience and access between young and older adults in 11 high-income  
46  
47 countries. J Adolesc Health 2015; 57(413):e420.  
48  
49

50  
51  
52 [11] Veit FC, Sanci LA, Coffey CM, Young DY, Bowes G. Barriers to effective primary  
53  
54 health care for adolescents. Med J Aust 1996;165(3):131-3.  
55  
56  
57  
58  
59  
60



1  
2  
3 [12] Booth ML, Bernard D, Quine S, Kang M, Usherwood T, Alperstein G, et al. Access to  
4 health care among Australian adolescents: Young people's perspectives and their socio-  
5 demographic distribution. J Adolesc Health 2004; 34(1): 97-103.  
6  
7

8  
9  
10  
11 [13] Kang M, Bernard D, Usherwood T, Quine S, Alperstein G, Kerr-Roubicek H, et al.  
12 Primary health care for young people: are there models of service delivery that improve  
13 access and quality? Youth Studies Australia 2006; 25(2):49-59.  
14  
15

16  
17 [14] NSW Department of Health, 2010, NSW Youth Health Policy 2011-2016: Healthy  
18 bodies, healthy minds, vibrant futures. NSW Department of Health, North Sydney.  
19  
20

21 [15] Tasmania Department of Health and Human Services Youth Health Service Framework  
22 2008-2011 Primary Health Services and Population Health Available at:  
23 [http://www.dhhs.tas.gov.au/\\_data/assets/pdf\\_file/0014/30344/Youth\\_Health\\_Service\\_Frame](http://www.dhhs.tas.gov.au/_data/assets/pdf_file/0014/30344/Youth_Health_Service_Framework_08-11.pdf)  
24 [work\\_08-11.pdf](http://www.dhhs.tas.gov.au/_data/assets/pdf_file/0014/30344/Youth_Health_Service_Framework_08-11.pdf) [Accessed 2 February 2017]  
25  
26  
27

28  
29 [16] National Mental Health Commission, 2014: The National Review of Mental Health  
30 Programmes and Services. Sydney: NMHC.  
31  
32

33  
34 [17] Garling P. Final Report of the Special Commission of Inquiry Acute Care Services in  
35 NSW Public Hospitals. State of NSW, 27 November 2008.  
36  
37

38  
39 [18] Freed GL, Gafforini S, Carson N. Age distribution of emergency department  
40 presentations in Victoria. Emergency Medicine Australasia 2015; 27:102-107.  
41  
42  
43  
44  
45  
46  
47  
48  
49  
50  
51

1  
2  
3 [19] Sawyer SM, Proimos J, Towns SJ. Adolescent-friendly health services: what have  
4 children's hospitals got to do with it? *J Paediatr Child Health* 2010; 46:214–216.  
5  
6  
7

8  
9  
10 [20] Kauer SD, Mangan C, Sanci L. Do online mental health services improve help-seeking  
11 for young people? A systematic review. *Journal of Medical Internet Research*.  
12 2014;16(3):e66.  
13  
14  
15

16  
17  
18 [21] Gold J, Pedrana AE, Stoope MA, Chang S, Howard S, Asselin J, et al. Developing  
19 health promotion interventions on social networking sites: recommendations from the  
20 FaceSpace Project. *Journal of Medical Internet Research* 2012; 14(1):e30.  
21  
22  
23  
24

25  
26  
27 [22] Booth M, Bernard D, Quine S, Kang M, Beasley L, Usherwood T, Alperstein G and  
28 Bennett D. Access to health care among NSW adolescents: Phase 1 Final Report. NSW  
29 Centre for the Advancement of Adolescent Health, The Children's Hospital at Westmead,  
30 May 2002. ISBN: 0 95779 513 0.  
31  
32  
33  
34  
35

36  
37  
38 [23] Dawson A, Jackson D (2013) The primary health care service experiences and needs of  
39 homeless youth: A narrative synthesis of current evidence, *Contemporary Nurse*, 44:1, 62-75,  
40 doi: 10.5172/conu.2013.44.1.62  
41  
42  
43  
44

45  
46  
47 [24] Quine S, Bernard D, Booth M, Kang M, Usherwood T, Alperstein G, Bennett D. Health  
48 and access issues among Australian adolescents: a rural-urban comparison. *Rural and Remote*  
49 *Health* 3 (online), 2003: 245. Available from: <http://rrh.deakin.edu.au>  
50  
51  
52  
53  
54

1  
2  
3 [25] Robinson, KH, Bansel, P, Denson, N, Ovenden, G & Davies, C 2014, *Growing Up*  
4  
5 *Queer: Issues Facing Young Australians Who Are Gender Variant and Sexuality Diverse*,  
6  
7 Young and Well Cooperative Research Centre, Melbourne.  
8

9  
10  
11 [26] Price M, Dalglish J. Help-seeking among Indigenous Australian adolescents. *Youth*  
12  
13 *Studies Australia*; 2013;32(1):10-8.  
14

15  
16  
17 [27] Colucci, E., Minas, H., Szwarc, J., Guerra, C., Paxton, G. (2015). "In or out? Barriers  
18  
19 and facilitators to refugee-background young people accessing mental health services."  
20  
21 *Transcultural Psychiatry* 52(6): 766-790.  
22  
23

24  
25  
26 [28] Grimshaw JM, Eccles MP, Lavis JN, Hill SJ, Squires JE. Knowledge translation of  
27  
28 research findings. *Implementation Science* 2012, 7:50.  
29  
30 <http://www.implementationscience.com/content/7/1/50>  
31  
32

33  
34  
35 [29] Kang M, Bernard D, Usherwood T, Quine S, Alperstein G, Kerr-Roubicek H, Elliott A  
36  
37 and Bennett DL (2005). *Better Practice in Youth Health: final report on the research study*  
38  
39 *Access to health care among young people in New South Wales: Phase 2*. NSW CAAH in  
40  
41 association with the Department of General Practice at Westmead Hospital. ISBN 0 97521  
42  
43 700 3.  
44  
45

46  
47  
48 [30] Chamberlain C, MacKenzie D. Australian Census Analytic Program: Counting the  
49  
50 Homeless, 2006. ABS Catalogue No. 2050.0. Canberra: Australian Bureau of Statistics;  
51  
52 2008.  
53  
54  
55  
56  
57  
58  
59  
60

1  
2  
3 [31] Ambresin A-E, Bennett K, Patton GC, Sanci LA, Sawyer SM. Assessment of youth-  
4 friendly health care: a systematic review of indicators drawn from young people's  
5 perspectives . J Adolesc Health 2013; 52:670-681.  
6  
7  
8

9  
10  
11 [32] IBM Corp. Released 2015. IBM SPSS Statistics for Windows, Version 23.0. Armonk,  
12 NY: IBM Corp.  
13  
14

15  
16  
17 [33] NVivo qualitative data analysis Software; QSR International Pty Ltd. Version 10, 2012.  
18  
19 Bowen S, Zwi AB (2005) Pathways to “evidence-informed” policy and practice: A  
20 framework for action. PLoS Med 2(7): e166.  
21  
22  
23

24  
25  
26 [34] Lavis JN, Robertson D, Woodside JM, McLeod CB, Abelson J and the Knowledge  
27 Transfer Study Group. How can research organizations more effectively transfer research  
28 knowledge to decision makers? *The Milbank Quarterly* 2003;81(2):221-48.  
29  
30  
31  
32

33  
34  
35 [35] Young and Well Cooperative Research Centre. Youth Involvement Guidelines.  
36 Available online at: [http://pandora.nla.gov.au/pan/141862/20160405-  
37 1343/www.youngandwellcrc.org.au/wp-content/uploads/2014/04/0\\_Young-and-Well-CRC-  
38 Youth-Involvement-Guidelines\\_150414\\_RM\\_v4.1.pdf](http://pandora.nla.gov.au/pan/141862/20160405-1343/www.youngandwellcrc.org.au/wp-content/uploads/2014/04/0_Young-and-Well-CRC-Youth-Involvement-Guidelines_150414_RM_v4.1.pdf). [Accessed 2 February 2017]  
39  
40  
41  
42  
43  
44  
45  
46  
47  
48  
49  
50  
51  
52  
53  
54  
55  
56  
57  
58  
59  
60

1  
2  
3  
4  
5  
6  
7  
8  
9  
10  
11  
12  
13  
14  
15  
16  
17  
18  
19  
20  
21  
22  
23  
24  
25  
26  
27  
28  
29  
30  
31  
32  
33  
34  
35  
36  
37  
38  
39  
40  
41  
42  
43  
44  
45  
46  
47  
48  
49  
50  
51  
52  
53  
54  
55  
56  
57  
58  
59  
60

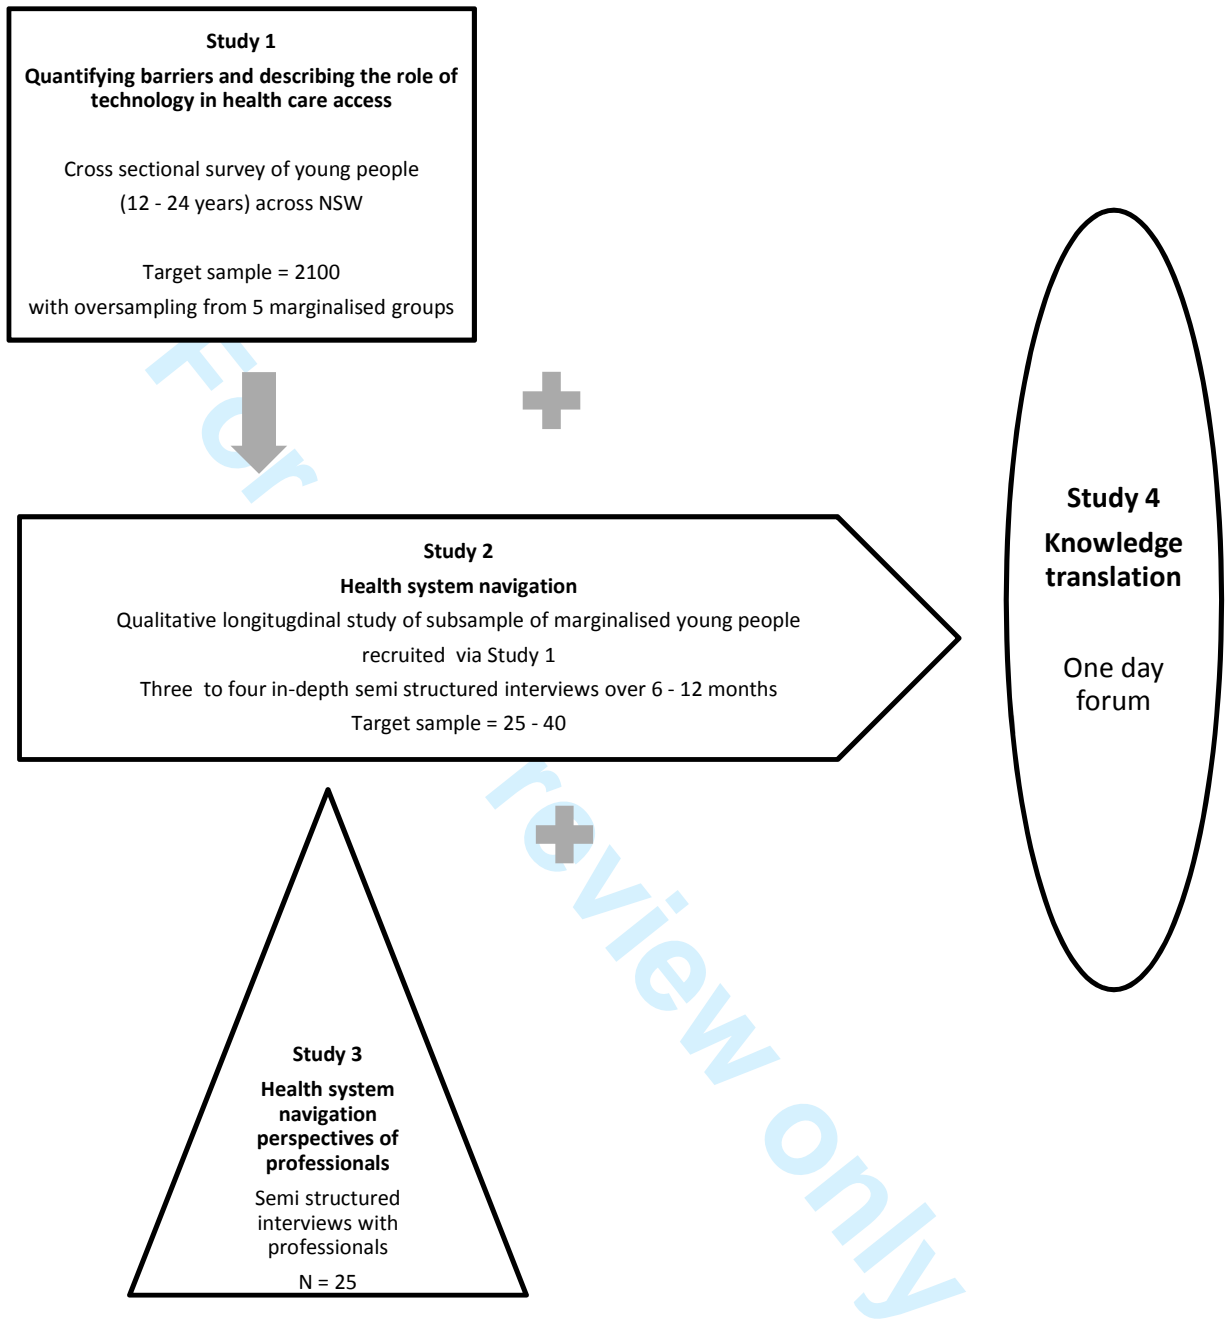

**Figure 1:** Access 3 design

1  
2  
3 **Figure 2: Questionnaire topic headings for Study 1**  
4

5 **PARTS 1 – 3 About you**  
6

7 Demographic information  
8

9 Internet use  
10

11 Identification as Aboriginal/ Torres Strait Islander, sexual identity, gender identity, intersex,  
12 refugee background  
13

14 Education and employment  
15

16 **PART 4 - 6 Accessing health care**  
17

18 Attitudes to accessing health services  
19

20 Experiences in past six months of accessing health services  
21

22 Use of technology in accessing health information and health services  
23

24 Barriers and facilitators to health care  
25

26 **PART 7 Your health**  
27

28 Self-rated health status  
29

30 Chronic health conditions  
31

32 Kessler-10 questionnaire  
33

34 WHO-5 wellbeing questionnaire  
35  
36  
37  
38  
39  
40  
41  
42  
43  
44  
45  
46  
47  
48  
49  
50  
51  
52  
53  
54  
55  
56  
57  
58  
59  
60

**Figure 3: Interview schedule headings for Study 2**

Sources of information about health and about health care and accessing health information

Experiences in past 3 – 6 months of health service visits (face to face and online) and hospitalisations

Role of technology in accessing health services

Barriers and facilitators to health care and health system navigation

Understandings of the ‘health system’

Suggestions for improvements to health services and the health system

NB: at subsequent interviews these prompts guide the interview with a focus on experiences within the past 3 – 4 months

**Figure 4: Interview schedule headings for Study 3**

Perspectives on young people's access and health system navigation

Health system present barriers and inefficiencies

Perspectives on marginalised young people's health access compared to other young people

Perspectives on information provided to young people by the health system about being healthy and accessing services

Suggestions for improvements to services and the health system generally

Examples of initiatives of programs to support young people navigate the health system



# BMJ Open

## Access 3 project protocol: young people and health system navigation in the digital age - a multi-faceted, mixed-methods study.

|                                 |                                                                                                                                                                                                                                                                                                                                                                                                                                                                                                                                                                           |
|---------------------------------|---------------------------------------------------------------------------------------------------------------------------------------------------------------------------------------------------------------------------------------------------------------------------------------------------------------------------------------------------------------------------------------------------------------------------------------------------------------------------------------------------------------------------------------------------------------------------|
| Journal:                        | <i>BMJ Open</i>                                                                                                                                                                                                                                                                                                                                                                                                                                                                                                                                                           |
| Manuscript ID                   | bmjopen-2017-017047.R1                                                                                                                                                                                                                                                                                                                                                                                                                                                                                                                                                    |
| Article Type:                   | Protocol                                                                                                                                                                                                                                                                                                                                                                                                                                                                                                                                                                  |
| Date Submitted by the Author:   | 22-May-2017                                                                                                                                                                                                                                                                                                                                                                                                                                                                                                                                                               |
| Complete List of Authors:       | Kang, Melissa; University of Technology Sydney Faculty of Health, Public Health<br>Robards, Fiona; University of Sydney, General Practice<br>Sanci, Lena; University of Melbourne, Department of General Practice<br>Steinbeck, Katharine; Univ Sydney<br>Jan, Stephen; The George Institute for Global Health,<br>Hawke, Catherine; University of Sydney, Rural Clinical School<br>Kong, Marlene; University of New South Wales - Randwick Campus, The Kirby Institute<br>Usherwood, Tim; University of Sydney, General Practice; The George Institute for Global Health |
| <b>Primary Subject Heading</b>: | Public health                                                                                                                                                                                                                                                                                                                                                                                                                                                                                                                                                             |
| Secondary Subject Heading:      | Health services research, Health policy                                                                                                                                                                                                                                                                                                                                                                                                                                                                                                                                   |
| Keywords:                       | Public health < INFECTIOUS DISEASES, Quality in health care < HEALTH SERVICES ADMINISTRATION & MANAGEMENT, Health policy < HEALTH SERVICES ADMINISTRATION & MANAGEMENT, World Wide Web technology < BIOTECHNOLOGY & BIOINFORMATICS                                                                                                                                                                                                                                                                                                                                        |
|                                 |                                                                                                                                                                                                                                                                                                                                                                                                                                                                                                                                                                           |

SCHOLARONE™  
Manuscripts

1  
2  
3 **Title page**  
4

5  
6 *Access 3 project protocol: young people and health system navigation in the digital age -*  
7 *a multi-faceted, mixed-methods study.*  
8

9  
10  
11 **Melissa Kang (corresponding author)**

12 Associate Professor, Australian Centre for Public and Population Health Research, Faculty of  
13 Health, University of Technology Sydney, PO Box 123 Ultimo NSW 2007

14  
15 [melissa.kang@uts.edu.au](mailto:melissa.kang@uts.edu.au)

16  
17  
18 Tel: +612 9514 7986  
19

20  
21 **Fiona Robards**

22 Senior Research Officer, Department of General Practice, Sydney Medical School  
23 Westmead, The University of Sydney, Sydney, Australia  
24  
25

26  
27  
28 **Lena Sanci**

29 Deputy Head of Department, Department of General Practice  
30 The University of Melbourne, Melbourne, Australia  
31  
32

33  
34  
35 **Katharine Steinbeck**

36 Medical Foundation Chair in Adolescent Medicine  
37 Sydney Medical School, The University of Sydney, Sydney, Australia  
38  
39

40  
41 **Stephen Jan**

42  
43 **The George Institute for Global Health**

44 Global Office, Sydney, Australia  
45  
46

47  
48 **Catherine Hawke**

49 School of Rural Health, Sydney Medical School, The University of Sydney, Orange,  
50 Australia  
51  
52

53  
54  
55 **Marlene Kong**

56 Program Head, Aboriginal and Torres Strait Islander Health Program, The Kirby Institute,  
57 University of New South Wales, Sydney, Australia  
58  
59

1  
2  
3  
4  
5 **Tim Usherwood**

6 Head, Department of General Practice, Sydney Medical School Westmead, Sydney Australia

7  
8 Honorary Professorial Fellow, The George Institute for Global Health, Sydney, Australia  
9

10  
11  
12 **Keywords:** Adolescents, youth, health services accessibility, knowledge translation, health  
13  
14 policy  
15

16  
17 **Word Count 3510**  
18  
19  
20  
21  
22  
23  
24  
25  
26  
27  
28  
29  
30  
31  
32  
33  
34  
35  
36  
37  
38  
39  
40  
41  
42  
43  
44  
45  
46  
47  
48  
49  
50  
51  
52  
53  
54  
55  
56  
57  
58  
59  
60

## ABSTRACT

### Background:

The integration of digital technology into everyday lives of young people has become widespread. It is not known whether and how technology influences barriers and facilitators to health care, and whether and how young people navigate between face-to-face and virtual health care. To provide new knowledge essential to policy and practice we designed a study that would explore health system access and navigation in the digital age. The study objectives are to:

1. identify barriers and facilitators to health care for young people and how these vary between groups
2. describe experiences of young people accessing and navigating the health system in New South Wales (NSW), Australia
3. describe health system inefficiencies, particularly for young people who are marginalized
4. provide policy-relevant knowledge translation of the research data

### Methods and Analysis:

This mixed methods study has four parts, including: (1) a cross-sectional survey of young people (12 – 24 years) residing in NSW, Australia (2) a longitudinal, qualitative study of a subsample of marginalized young people (defined as young people who: identify as Aboriginal and/ or Torres Strait Islander; are experiencing homelessness; identify as sexuality and/ or gender diverse; are of refugee or vulnerable migrant background; and/ or live in rural or remote NSW) (3) interviews with professionals (4) a knowledge translation forum

### Ethics and Dissemination:

Ethics approvals were sought and granted. Data collection commenced in March 2016 and will continue until June 2017. This study will gather practice and policy-relevant intelligence

1  
2  
3 about contemporary experiences of young people and health services, with a unique focus on  
4  
5 five different groups of marginalised young people, documenting their experiences over time.  
6  
7 *Access 3* will explore navigation around all levels of the health system, determine whether  
8  
9 digital technology is integrated into this, and if so how, and will translate findings into  
10  
11 policy-relevant recommendations.  
12  
13  
14  
15  
16  
17  
18  
19  
20  
21  
22  
23  
24  
25  
26  
27  
28  
29  
30  
31  
32  
33  
34  
35  
36  
37  
38  
39  
40  
41  
42  
43  
44  
45  
46  
47  
48  
49  
50  
51  
52  
53  
54  
55  
56  
57  
58  
59  
60

For peer review only

## STRENGTHS AND LIMITATIONS

### Strengths

- Design allows for breadth and depth of enquiry about barriers, facilitators and health system navigation
- Stakeholder engagement assists with recruitment and interpretation of findings and policy relevance
- Policy translation as part of study design optimises incorporation into new youth health policy

### Limitations

- Potential for recruitment bias due to sampling strategies
- Inclusion criteria for marginalised groups study will not capture the full range of young people who are potentially marginalised.

## MANUSCRIPT

### BACKGROUND

The health and wellbeing of young people (12 – 24 years) are shaped by unique developmental factors as well as a range of social, cultural and environmental determinants. In high income countries including Australia, mental health problems and chronic physical illness are the major health conditions experienced by young people.[1, 2] Timely access to appropriate health care is an important determinant of young people’s health. In primary care, identification of health risk behaviours and early intervention can mitigate some negative health trajectories.[3] For young people with chronic health conditions, health risk behaviours occur at similar or higher rates compared to well peers [4], thus transition policies and programs to prevent disengagement from health care have been established in many countries.[5] Hospitalised young people have needs that require specific service delivery and policy responses, since developmental factors, legal minor status and professional discomfort can contribute to adverse events for adolescents in hospital.[6] Despite evidence-based guidelines for ‘youth friendly’ health services,[7] young people continue to have suboptimal experiences. A study across eleven developed countries found that young adults (18 – 25 years) had worse satisfaction with health services and significantly higher cost barriers compared to older adults.[8]

In Australia, access to and models of health care were described in the 1990s – early 2000s [9-11] and have informed youth health policy.[12, 13] Despite these initiatives, health care has become more fragmented [14, 15] and presentations to Emergency Departments are increasing among young people, possibly due to general practitioner (GP) unavailability and cost.[16] In the hospital sector, there is also major scope to improve ‘adolescent-friendliness’.[17] Most importantly, since almost 100% of Australian young people have

1  
2  
3 access to the internet [18] and most have smartphones,[19] evidence is now needed to  
4  
5 understand how digital technology influences access to health care. A recent systematic  
6  
7 review suggested that online mental health services may play a small role in facilitating  
8  
9 access.[20] Online interventions may also help facilitate some access to STI testing.[21]  
10

11  
12  
13  
14 This study will update knowledge about access in the digital age, explore health care  
15  
16 navigation, and will embed a knowledge translation process to address the evidence of failure  
17  
18 for research to be translated into policy and practice.[22] There will be a focus on  
19  
20 marginalised young people whose experiences have been less comprehensively studied. For  
21  
22 example, a recent systematic review of homeless youth and healthcare access identified only  
23  
24 13 studies.[23] Recent Australian studies exploring access among Indigenous young people  
25  
26 [24] and young people of refugee background, [25] have been small cross-sectional studies  
27  
28 focusing on mental health care. Earlier research among young people living in rural and  
29  
30 remote areas before the rise of digital technology identified that cost, confidentiality and  
31  
32 provider availability were more prominent barriers compared to urban counterparts.[26] A  
33  
34 recent cross-sectional study of sexuality and gender diverse young people found that fear of  
35  
36 discrimination hindered optimal health care.[27] This study will target these groups of young  
37  
38 people and explore barriers, navigation over time, and the role of technology in access to  
39  
40 health care.  
41  
42  
43  
44  
45  
46

47 This protocol describes a multi-faceted, mixed-methods study known as *Access 3*. It takes its  
48  
49 name from the previous studies called Access Phase 1 [28] and Access Phase 2 [29] and was  
50  
51 funded by the state health department of New South Wales (NSW), Australia. *Access 3* aims  
52  
53 to explore ways in which young people in NSW access, navigate and experience all levels of  
54  
55  
56  
57  
58  
59  
60



1  
2  
3 the health system, how digital technology is integrated into these processes, and to translate  
4  
5 findings into practice and policy-relevant recommendations.  
6  
7  
8

## 9 10 **METHODS AND ANALYSIS**

11 The *Access 3* study objectives are to:

- 14 1. identify barriers and facilitators to accessing health care for young people in NSW  
15 and how these vary between groups  
16  
17
- 18 2. describe experiences of young people accessing and navigating the health system in  
19 NSW  
20  
21
- 22 3. describe health system inefficiencies for young people who are marginalized  
23
- 24 4. provide practice and policy-relevant knowledge translation of the research data  
25  
26

27 Marginalised young people will be defined as meeting at least one of the following  
28 criteria:  
29

- 30 • Living in rural/ remote NSW
- 31
- 32 • Being homeless or at risk of homelessness (using the cultural definition) [30]
- 33
- 34 • Being of refugee background or a recently arrived migrant from a non-English  
35 speaking background  
36  
37
- 38 • Being Aboriginal and/or Torres Strait Islander  
39
- 40 • Being same-sex attracted or identifying as gay, lesbian, bisexual, transgender,  
41 queer, intersex or asexual (GLBTQIA)  
42  
43  
44  
45  
46

47 These five groups have been selected to provide a purposive and varied sample, and our  
48 inclusion criteria are not intended to represent an exhaustive classification of all marginalised  
49 young people. However, by exploring the needs of young people belonging to one or more of  
50 these groups, we may also gain insight into the experiences of marginalised young people  
51 more broadly.  
52  
53  
54  
55  
56  
57  
58  
59  
60

1  
2  
3 *Access 3* comprises four separate but interconnected studies, illustrated in **Figure 1**.

4  
5 **Study One**

6  
7 Aim: to describe and quantify barriers, facilitators, and how technology is used, to access  
8 health care, and how these vary by age, gender and marginalization

9  
10  
11 Design: cross-sectional survey

12  
13  
14 Participants: non-probability sample of young people 12 – 24 years residing in NSW with  
15 oversampling of marginalized young people

16  
17  
18 Recruitment: online and offline. Online recruitment has included targeted emails to youth  
19 relevant networks, social media (Facebook, Twitter, and Instagram) and opportunistic online  
20 promotion of the survey. Offline recruitment has occurred face-to-face in education-linked  
21 settings, youth accommodation services and forums where groups of young people meet (e.g.  
22 advocacy groups). To purposively sample marginalized young people, we have worked with  
23 networks and advocates from a range of organizations in rural areas, supported  
24 accommodation services, community organisations and services who work with or for  
25 homeless young people, sexuality diverse and gender diverse young people, Aboriginal and /  
26 or Torres Strait Islander young people, young people living in rural areas and young people  
27 of refugee or refugee like background. We have also relied on convenience and snowball  
28 sampling methods to achieve our sample size.

29  
30  
31  
32  
33  
34  
35  
36  
37  
38  
39  
40  
41  
42  
43 Data collection: anonymous questionnaire administered via an online survey platform or by  
44 hardcopy. Data collection commenced in February 2016. The online survey was closed in  
45 February 2017, and hardcopy data collection is about to close as of March 2017. The  
46 questionnaire was guided by published evidence [28, 29, 31] about known barriers to access  
47 and ‘youth-friendliness’ indicators applicable to primary and community based health  
48 services and hospitals. Questions about the impact of digital technology on whether, when  
49 and how to access health care were included. Demographic data were collected, as well as the  
50  
51  
52  
53  
54  
55  
56  
57  
58  
59  
60

1  
2  
3 presence of chronic health conditions and/ or disability, and young people's knowledge and  
4 attitudes to health services and accessing care. The questionnaire was developed in  
5 consultation with and piloted among a Youth Consultant group who also assisted with  
6 promotion of the survey. The questionnaire topic headings are listed in **Figure 2**.  
7  
8  
9

10  
11 Analysis: Quantitative analysis, using the statistical software program, SPSS,[32] of the  
12 barriers and facilitators and use of digital technology, encountered by age, gender, rurality,  
13 country of birth, Indigenous status, and homelessness, refugee status, cultural background  
14 and same-sex attraction and/or identification as lesbian, gay, bisexual, transgender, queer,  
15 intersex and/ or asexual.  
16  
17  
18  
19  
20  
21

22 Qualitative thematic analysis of free text responses, with the aid of the software program  
23 NVivo,[33] will be undertaken to describe barriers and facilitators to access, use of digital  
24 technology in help seeking, young people's understanding of the health system and the  
25 influences on their decisions to access which services when.  
26  
27  
28  
29  
30

31  
32 Expected outcomes:  
33

34 The primary outcomes will be self-report:  
35

36 - using yes/ no responses to a list of known barriers (awareness of services; confidentiality,  
37 fear/ embarrassment; negative experiences; physical barriers including cost, transport,  
38 availability of services, opening hours).  
39  
40  
41

42 - of barriers and facilitators using Likert scale responses  
43  
44

45 To report frequencies with a 95% confidence interval for non-marginalised young people and  
46 any group of marginalised young people, and to be able to detect minimum clinically and  
47 policy relevant differences in primary outcomes between groups we need approximately 350  
48 respondents from each group. Our target sample size is 2100.  
49  
50  
51  
52  
53  
54  
55  
56  
57  
58  
59  
60

1  
2  
3 Consent and Ethics: Completion of the survey will be deemed to be consent to participate.  
4  
5 University of Sydney Human Research Ethics Committee approval 2015/874; NSW  
6  
7 Aboriginal Health and Medical Research Council Ethics Committee approval 1142/15.  
8

## 9 **Study Two**

10 Aim: to explore in depth the health service-related experiences of marginalized young people  
11  
12 over time, to quantify contact with health services in real time, and to describe inefficiencies  
13  
14 or foregone care.  
15  
16

17 Design: longitudinal, qualitative study using one-on-one semi-structured interviews  
18

19 Participants: Young people who:  
20

- 21 1. belong to one or more of the marginalized groups and
- 22 2. have had contact with the health system in the previous six months which constitutes an  
23 *index event*. The index event will be defined as: presentation to an Emergency Department,  
24  
25 discharge from hospital, contact with a hospital outpatient or community-based health service  
26  
27 for one or more of the following health conditions: mental health, drug and alcohol, sexual  
28  
29 health, physical harm or injury, chronic medical illness or disability. Having an index event  
30  
31 as an inclusion criterion will narrow the target population to include those young people  
32  
33 likely to need or want ongoing contact with the health system over the study period, which  
34  
35 will be important for studying system navigation.  
36  
37

38 Recruitment: Participants will be recruited from the cross-sectional survey sample and  
39  
40 selected on the basis of answers to identifier questions in the survey. We will recruit five to  
41  
42 eight young people from each of the marginalized groups, noting that some young people  
43  
44 belong to more than one of those groups.  
45  
46

47 Data collection: we will conduct three to four interviews over six to 12 months with each  
48  
49 participant. These can be face-to-face, by telephone or Skype and will be audio-recorded and  
50  
51 transcribed. Interpreters will be used if needed and, if desired, a parent/ carer can be present  
52  
53  
54  
55  
56  
57  
58  
59  
60

1  
2  
3 for participants under 14. Data collection commenced in March 2016 and will continue until  
4  
5 May/ June 2017. The interview schedule includes questions about experiences of each  
6  
7 contact with a health service as well as navigation through the health system over time  
8  
9 (referral processes, communication between services, support for follow up, understanding of  
10  
11 the health system). The role of technology in making contact with services and moving  
12  
13 around the health system will be explored. The 'health system' is defined broadly as any  
14  
15 service delivering health care, including online services, general practice, emergency  
16  
17 departments, allied health services, medical specialist services, pathology and imaging  
18  
19 services, pharmacy services (e.g. seeking advice from a pharmacist about medication), school  
20  
21 counselling services, hospital outpatient services, hospital admissions, and any other  
22  
23 community or hospital based services (youth health, mental health, headspace, drug and  
24  
25 alcohol, sexual health, Family Planning etc.). The interviews will be piloted among three to  
26  
27 five youth consultants to ensure that questions are clear and the schedule flows logically. The  
28  
29 interview schedule headings are listed in **Figure 3**.  
30  
31  
32  
33

34 Data analysis: quantitative analysis will be descriptive and count frequencies such as number  
35  
36 of encounters and number of services visited per participant over the study period. Interview  
37  
38 transcripts will be entered into NVivo to assist with data coding; thematic analysis will be  
39  
40 conducted to derive major and minor themes.  
41  
42

43 Expected outcomes: Number of service encounters and services accessed, referral patterns  
44  
45 (including self-referral), foregone access due to a range of barriers, adherence to medications  
46  
47 and follow-up care, experiences of health encounters and the young person's perceptions  
48  
49 about their health after each encounter. We will also describe areas of inefficiency in the  
50  
51 system (such as duplication of services, multiple providers, long waiting times for specialist  
52  
53 appointments, post-hospital discharge care) as well as examples of integration, coordination  
54  
55 and system efficiency.  
56  
57  
58  
59  
60

1  
2  
3 Consent and Ethics: Signed, written consent will be obtained from all participants prior to  
4 interviews. Parental consent was obtained for young people aged 12 and 13, in addition to  
5 consent from the young person. University of Sydney Human Research Ethics Committee  
6 approval 2015/971; NSW Aboriginal Health and Medical Research Council Ethics  
7 Committee approval 1141/15.  
8  
9

### 14 **Study Three:**

15  
16 Aim: to obtain the perspectives of professionals about how young people (12 – 24 years) in  
17 NSW access and navigate the health system  
18  
19

20 Design: qualitative cross sectional study using one-on-one semi-structured interviews  
21  
22

23 Participants: Health service managers and experienced clinicians with in-depth knowledge  
24 about the health system and how it supports young people's access to health care, who can  
25 provide key informant perspectives on health system navigation for 12 – 24 year olds in  
26 NSW. The sampling frame is professionals from different sectors (health sector and non-  
27 government organisations) and different levels of the health system (primary, secondary,  
28 tertiary). A list of potential participants will be drawn from existing networks and contacts of  
29 the *Access 3* study investigator and reference groups. Data collection commenced in June  
30 2016 and will be completed by May 2017.  
31  
32  
33

34 Recruitment: direct approach by email  
35  
36  
37  
38  
39

40 Data collection: face to face or telephone interviews which will be audio-recorded and  
41 transcribed. The interview schedule includes questions about barriers to care for young  
42 people, health system integration and coordination, and client-centred care. Content and  
43 themes derived from early young people interviews in Study 2 will be explored with the  
44 professionals where relevant or appropriate. Interviews were piloted among two to three  
45 Reference Group professional members to check for clarity and flow. Interview schedule  
46 headings are listed in **Figure 4**.  
47  
48  
49  
50  
51  
52  
53  
54  
55  
56  
57  
58  
59  
60

1  
2  
3 Data analysis: Interview transcripts will be entered into NVivo to assist with data coding;  
4  
5 content and thematic analysis will be conducted to derive major and minor themes.  
6

7 Expected outcomes: complementarity/ triangulation of data from Study 2; contrasting  
8  
9 perspectives between young people and professionals, practice or program examples and  
10  
11 recommendations that may inform policy.  
12

13  
14 Consent and Ethics: Signed, written consent will be obtained from all participants prior to  
15  
16 interviews. University of Sydney Human Research Ethics Committee approval 2016/232;  
17  
18 NSW Aboriginal Health and Medical Research Council Ethics Committee approval 1175/16.  
19

#### 20 **Study Four:**

21  
22 Aim: to translate synthesized data from Studies 1, 2 and 3 into policy-ready recommendations  
23

24  
25 Design: one-day facilitated workshop with stakeholders  
26

27  
28 Participants: young people, policy analysts, senior NSW Health staff, health managers,  
29  
30 senior/ expert clinicians, researchers, other key stakeholders (e.g. community advocates)  
31

32  
33 Recruitment: direct approach by email

34  
35 Data collection: small group discussions/ focus groups, recorded in writing. We will use a  
36  
37 workshop framework informed by Lavis [34] and Grimshaw.[28] Lavis et al developed a  
38  
39 framework for knowledge transfer which asks five key questions: 1. What should be  
40  
41 transferred? 2. To whom should research knowledge be transferred? 3. By whom should  
42  
43 research knowledge be transferred? 4. How should research knowledge be transferred? 5.  
44  
45 With what effect should research knowledge be transferred?  
46

47  
48 Grimshaw et al extend this framework to suggest that knowledge translation strategies need  
49  
50 to consider likely barriers and facilitators to optimize their success. The workshop was held  
51  
52 on 21 November 2016 and presented preliminary data analysis from Studies 1, 2 and 3. The  
53  
54 NSW health department requested that the workshop be conducted before the end of the year,  
55  
56 due to the need to inform the youth health policy framework. Representatives from the  
57  
58  
59  
60

research team will continue to work with policy analysts on drafts and consultations of the youth health policy framework until it is finalized and approved by the NSW health department in the second half of 2017.

Data analysis: content and thematic analysis of group discussions

Expected outcomes: To provide NSW Health with concise policy recommendations for access to health care and health system navigation for youth health policy and advocacy.

Ethics: Not required

### Study Timeline

The Access 3 study as a whole commenced in February 2016. Data collection for Study 1 was completed in March 2017, but is ongoing for the other components. The timeline for the Access 3 study is depicted below:

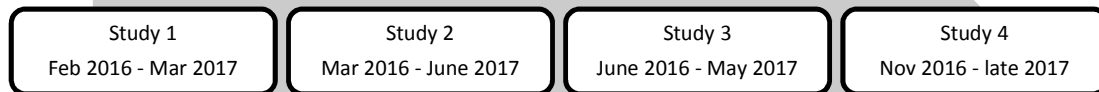

### Stakeholder engagement

Three strategies underpin the study's stakeholder engagement:

1. Involvement of young people

Youth participation [35] has been sought in several ways. A Youth Consultant committee was convened for the life of the study to assist with design and piloting of instruments for Studies 1 and 2 and for promotion of the survey (Study 1). In addition youth representation was sought on the study Reference Groups, and youth participants as key stakeholders at the policy translation workshop.

2. Structure of study governance and advisory teams

Due to its complexity, five groups were convened to manage and guide the study. The *Chief Investigator* team brings academic rigour and leadership to the research. An *Associate*



1  
2  
3 *Investigator* team brings a combination of academic, project management and network  
4 expertise and will assist in some aspects of the research such as questionnaire and interview  
5 design/ refinement, methods of recruitment, data analysis and dissemination. The *Youth*  
6  
7 *Consultant* committee provides ongoing advice to all aspects of the study. Two *Reference*  
8  
9 *Groups (Metropolitan and Rural)* have been convened to provide critical feedback on the  
10 study at different stages. This group consists of stakeholders who will be invited to comment  
11 on any aspects of the study but who may also be asked to assist with troubleshooting,  
12 engagement with participants and policy translation. Policy makers are included on the  
13 Reference Group.  
14  
15  
16  
17  
18  
19  
20  
21

### 22 23 3. Direct engagement with policy makers

24 Regular meetings have been scheduled over the study between representatives of the chief  
25 investigator team and senior policy analysts and managers in NSW Health and the NSW  
26 Youth Health Policy Reference group.  
27  
28  
29  
30  
31  
32  
33

## 34 **ETHICS AND DISSEMINATION**

35  
36 Given the multi-faceted design of this study, ethics approvals have been reported above  
37 following the description of Methods and Analysis for each study component. In this study  
38 we are exploring the health service access and navigation experiences of young people in a  
39 generation where technology is integrated into daily life. This will provide new evidence, of  
40 national and international relevance, for policy makers and practitioners charged with  
41 improving the health of young people. To answer our research questions, we are employing  
42 quantitative and qualitative research methods and have broad stakeholder and youth  
43 engagement an integral component of the design.  
44  
45  
46  
47  
48  
49  
50  
51  
52  
53  
54  
55  
56  
57  
58  
59  
60

1  
2  
3 While we anticipate that this study will generate several important publications based on our  
4 findings, we also hope that this paper offers a protocol for a complex and large policy  
5 implementation initiative that will contribute to the translational research literature. Our  
6 design intends to address policy questions through robust research while embedding a way to  
7 maintain policy engagement.  
8  
9  
10  
11  
12

13  
14  
15  
16 The cross-sectional survey will provide for breadth of information-gathering across the youth  
17 population in NSW and quantitative analysis of data. Online surveys promoted through social  
18 media have the potential for wide reach, which is essential in a relatively short time frame.  
19  
20 The survey has identified potential participants for the longitudinal study, and survey data for  
21 those participants will act as a springboard for the initial interviews. The longitudinal study  
22 explores the young person's journey through all parts of the health system, and allows an in-  
23 depth investigation into their navigation through the health system over time. There has been  
24 very little longitudinal research into health system navigation generally.  
25  
26  
27  
28  
29  
30  
31  
32  
33  
34  
35

36 Our focus on subpopulations of marginalised young people is unique in its scope, since most  
37 research into marginalised groups of young people tends to focus on only one group. By  
38 targeting young people who are marginalised, we will also develop an understanding of how  
39 the health system supports those with complex needs and where there might be inefficiencies  
40 and gaps. This approach will enable comparison between groups and a better understanding  
41 of relative inequities in access to health care and variation in their use of technology for  
42 navigation of health services.  
43  
44  
45  
46  
47  
48  
49  
50  
51  
52  
53

54 To understand structural issues and system inefficiencies more effectively, we are  
55 interviewing professionals and service managers, whose perspectives are also important in  
56  
57  
58  
59  
60

1  
2  
3 policy and practice translation. Key to our design therefore is the knowledge translation  
4  
5 component of the study. To extend our academic interpretations of new knowledge, we will  
6  
7 actively seek, document and translate our findings into policy- and practice- relevant  
8  
9 recommendations. Whilst we have a knowledge translation study as part of the research  
10  
11 design, we are incorporating knowledge translation theory [22,, 34] into other aspects of the  
12  
13 study by involving stakeholders in formal reference groups and through academic  
14  
15 representation on the youth health policy advisory group. Feedback relating to new  
16  
17 knowledge will be sought from the research team. Simultaneously, members of the research  
18  
19 team will be involved in broader policy consultation. Together these actions will provide  
20  
21 substantial iterative processes to guide knowledge translation.  
22  
23  
24

25  
26  
27 The main limitations of our study include the potential for recruitment bias due to our  
28  
29 sampling strategies. Although we aim to oversample young people from five marginalised  
30  
31 groups, we also want to include a broad cross-section of young people living in NSW in the  
32  
33 online survey. By recruiting participants through social media and stakeholder networks, we  
34  
35 will have a convenience rather than a representative sample of young people in NSW. Our  
36  
37 inclusion criteria for the longitudinal part of our study will not capture the full range of young  
38  
39 people who are potentially marginalised.  
40  
41  
42  
43

44  
45 In conclusion, a collaborative and participatory ethos underpins our design and research  
46  
47 process. The study governance and support structure including young people and  
48  
49 stakeholders, will be assembled at the outset of the study and will guide all stages of the  
50  
51 study. By explicitly examining the use of digital technology as an integrated process in health  
52  
53 seeking and health care, we will generate novel empirical evidence about access to health  
54  
55 care that will inform clinical practice, health service management and policy makers.  
56  
57  
58  
59  
60

1  
2  
3 Research outcomes can be used to focus policy and practice towards the alignment of  
4 structures and processes which can target and reduce inequalities in health care access. The  
5 ultimate objective is to improve health and well-being in vulnerable young people in NSW.  
6  
7  
8

### 9 **Acknowledgments**

10 We would like to thank all our youth consultants, associate investigators, reference group  
11 members for your active engagement and support of this study. We also thank Jessica Harper  
12 who provided assistance with Ethics applications for Studies 1 and 2, technical help in  
13 developing the online survey and general research administration support.  
14  
15  
16  
17  
18  
19

### 20 **Competing Interests**

21 The authors declare that we have no competing interests.  
22  
23  
24

### 25 **Funding**

26 The *Access 3* study is funded by NSW Health. Representatives from the funding body are  
27 members of the Project Reference Group. They have also been involved in planning the  
28 knowledge translation one day workshop to ensure that policy relevant outcomes are  
29 achieved.  
30  
31  
32  
33  
34  
35

### 36 **Data sharing**

37 Data sharing is not applicable to this article; being a study protocol, as no datasets were  
38 generated or analysed.  
39  
40  
41  
42

### 43 **Authors' contributions**

44 MKang led the study design, wrote the tender for the grant, is the lead investigator, and wrote  
45 the draft for the protocol manuscript. FR is the project manager responsible for day to day  
46 conduct of the study and contributed to the literature review and manuscript. LS, KS, SJ, CH,  
47 MKong and TU contributed to the study design, provide research leadership to the study, and  
48 provided feedback on the manuscript. All authors read and approved the final manuscript.  
49  
50  
51  
52  
53  
54  
55  
56  
57  
58  
59  
60

## References

- [1] Patton GC, Sawyer SM, Santelli JS, Ross DA, Afifi R, Allen NB, et al. Our future: a Lancet commission on adolescent health and wellbeing. *Lancet* 2016; 387: 2423–78.
- [2] Australian Institute of Health and Welfare 2014. Australia's health 2014. Australia's health series no. 14. Cat. no. AUS 178. Canberra: AIHW.
- [3] Sanci LA, Chondros P, Sawyer SM, Pirkis J, Ozer E, Hegarty K, et al. Responding to young people's health risks in primary care: a cluster randomised trial of training clinicians in screening and motivational interviewing. *PLOS One* 2015; doi: 10.1371/journal.pone.0137581.
- [4] Sawyer SM, Drew S, Yeo MS, Britto MT. Adolescents with a chronic condition: challenges living, challenges treating. *Lancet* 2007; 369:1481–89.
- [5] Wong LHL, Chan FWK, Wong FYY, Wong ELY, Huen KF, Yeoh EK, et al. Transition care for adolescents and families with chronic illnesses. *J Adolesc Health* 2010; 47:540-546.
- [6] Woods DM, Holl JL, Klein JD, Thomas EJ. Patient safety problems in adolescent medical care. *J Adolesc Health* 2006; 38:5-12.
- [7] World Health Organisation 2015. Global standards for quality health-care services for adolescents: a guide to implement a standards-driven approach to improve the quality of health care services for adolescents. Volume 1: Standards and criteria. [http://apps.who.int/iris/bitstream/10665/183935/1/9789241549332\\_vol1\\_eng.pdf](http://apps.who.int/iris/bitstream/10665/183935/1/9789241549332_vol1_eng.pdf). [Accessed 21 December 2016]
- [8] Hargreaves DS, Greaves F, Levay C, Mitchell I, Koch U, Esch T, et al. Comparison of health care experience and access between young and older adults in 11 high-income countries. *J Adolesc Health* 2015; 57(413):e420.
- [9] Veit FC, Sanci LA, Coffey CM, Young DY, Bowes G. Barriers to effective primary health care for adolescents. *Med J Aust* 1996;165(3):131-3.

1  
2  
3 [10] Booth ML, Bernard D, Quine S, Kang M, Usherwood T, Alperstein G, et al. Access to  
4 health care among Australian adolescents: Young people's perspectives and their socio-  
5 demographic distribution. *J Adolesc Health* 2004; 34(1): 97-103.  
6  
7

8  
9 [11] Kang M, Bernard D, Usherwood T, Quine S, Alperstein G, Kerr-Roubicek H, et al.  
10 Primary health care for young people: are there models of service delivery that improve  
11 access and quality? *Youth Studies Australia* 2006; 25(2):49-59.  
12  
13

14 [12] NSW Department of Health, 2010, NSW Youth Health Policy 2011-2016: Healthy  
15 bodies, healthy minds, vibrant futures. NSW Department of Health, North Sydney.  
16  
17

18 [13] Tasmania Department of Health and Human Services Youth Health Service Framework  
19 2008-2011 Primary Health Services and Population Health Available at:  
20 [http://www.dhhs.tas.gov.au/\\_data/assets/pdf\\_file/0014/30344/Youth\\_Health\\_Service\\_Frame](http://www.dhhs.tas.gov.au/_data/assets/pdf_file/0014/30344/Youth_Health_Service_Frame)  
21 [work\\_08-11.pdf](http://www.dhhs.tas.gov.au/_data/assets/pdf_file/0014/30344/Youth_Health_Service_Frame) [Accessed 2 February 2017]  
22  
23

24  
25 [14] National Mental Health Commission, 2014: The National Review of Mental Health  
26 Programmes and Services. Sydney: NMHC.  
27  
28

29 [15] Garling P. Final Report of the Special Commission of Inquiry Acute Care Services in  
30 NSW Public Hospitals. State of NSW, 27 November 2008.  
31  
32

33 [16] Freed GL, Gafforini S, Carson N. Age distribution of emergency department  
34 presentations in Victoria. *Emergency Medicine Australasia* 2015; 27:102–107.  
35  
36

37 [17] Sawyer SM, Proimos J, Towns SJ. Adolescent-friendly health services: what have  
38 children's hospitals got to do with it? *J Paediatr Child Health* 2010; 46:214–216.  
39  
40

41 [18] Australian Communications and Media Authority (ACMA). Aussie teens online:  
42 research snapshot. ACMA, 1 July 2014. Available at  
43 [http://www.acma.gov.au/theACMA/engage-blogs/engage-blogs/Research-snapshots/Aussie-](http://www.acma.gov.au/theACMA/engage-blogs/engage-blogs/Research-snapshots/Aussie-teens-online)  
44 [teens-online](http://www.acma.gov.au/theACMA/engage-blogs/engage-blogs/Research-snapshots/Aussie-teens-online) [Accessed 2 February 2017]  
45  
46  
47  
48  
49  
50  
51  
52  
53  
54  
55  
56  
57  
58  
59  
60

- 1  
2  
3 [19] Australian Communications and Media Authority (ACMA). Communications report  
4 2013–14 series Report 1—Australians’ digital lives. ACMA, March 2015. Available at  
5 [http://www.acma.gov.au/~media/Research%20and%20Analysis/Research/pdf/Australians%](http://www.acma.gov.au/~media/Research%20and%20Analysis/Research/pdf/Australians%20digital%20livesFinal%20pdf.pdf)  
6 [20digital%20livesFinal%20pdf.pdf](http://www.acma.gov.au/~media/Research%20and%20Analysis/Research/pdf/Australians%20digital%20livesFinal%20pdf.pdf) [Accessed 2 February 2017]  
7  
8  
9  
10  
11 [20] Kauer SD, Mangan C, Sanci L. Do online mental health services improve help-seeking  
12 for young people? A systematic review. *Journal of Medical Internet Research*.  
13 2014;16(3):e66.  
14  
15 [21] Gold J, Pedrana AE, Stooze MA, Chang S, Howard S, Asselin J, et al. Developing  
16 health promotion interventions on social networking sites: recommendations from the  
17 FaceSpace Project. *Journal of Medical Internet Research* 2012; 14(1):e30.  
18  
19 [22] Grimshaw JM, Eccles MP, Lavis JN, Hill SJ, Squires JE. Knowledge translation of  
20 research findings. *Implementation Science* 2012, 7:50.  
21  
22 <http://www.implementationscience.com/content/7/1/50>  
23  
24 [23] Dawson A, Jackson D (2013) The primary health care service experiences and needs of  
25 homeless youth: A narrative synthesis of current evidence, *Contemporary Nurse*, 44:1, 62-75,  
26 doi: 10.5172/conu.2013.44.1.62  
27  
28 [24] Price M, Dalglish J. Help-seeking among Indigenous Australian adolescents. *Youth*  
29 *Studies Australia*; 2013;32(1):10-8.  
30  
31 [25] Colucci, E., Minas, H., Szwarc, J., Guerra, C., Paxton, G. (2015). "In or out? Barriers  
32 and facilitators to refugee-background young people accessing mental health services."  
33 *Transcultural Psychiatry* 52(6): 766-790.  
34  
35 [26] Quine S, Bernard D, Booth M, Kang M, Usherwood T, Alperstein G, Bennett D. Health  
36 and access issues among Australian adolescents: a rural-urban comparison. *Rural and Remote*  
37 *Health* 3 (online), 2003: 245. Available from: <http://rrh.deakin.edu.au>  
38  
39  
40  
41  
42  
43  
44  
45  
46  
47  
48  
49  
50  
51  
52  
53  
54  
55  
56  
57  
58  
59  
60

1  
2  
3 [27] Robinson, KH, Bansel, P, Denson, N, Ovenden, G & Davies, C 2014, *Growing Up*  
4  
5 *Queer: Issues Facing Young Australians Who Are Gender Variant and Sexuality Diverse*,  
6  
7 Young and Well Cooperative Research Centre, Melbourne.

8  
9  
10 [28] Booth M, Bernard D, Quine S, Kang M, Beasley L, Usherwood T, Alperstein G and  
11  
12 Bennett D. Access to health care among NSW adolescents: Phase 1 Final Report. NSW  
13  
14 Centre for the Advancement of Adolescent Health, The Children's Hospital at Westmead,  
15  
16 May 2002. ISBN: 0 95779 513 0.

17  
18 [29] Kang M, Bernard D, Usherwood T, Quine S, Alperstein G, Kerr-Roubicek H, Elliott A  
19  
20 and Bennett DL (2005). Better Practice in Youth Health: final report on the research study  
21  
22 *Access to health care among young people in New South Wales: Phase 2*. NSW CAAH in  
23  
24 association with the Department of General Practice at Westmead Hospital. ISBN 0 97521  
25  
26 700 3.

27  
28  
29 [30] Chamberlain C, MacKenzie D. Australian Census Analytic Program: Counting the  
30  
31 Homeless, 2006. ABS Catalogue No. 2050.0. Canberra: Australian Bureau of Statistics;  
32  
33 2008.

34  
35  
36 [31] Ambresin A-E, Bennett K, Patton GC, Sanci LA, Sawyer SM. Assessment of youth-  
37  
38 friendly health care: a systematic review of indicators drawn from young people's  
39  
40 perspectives . *J Adolesc Health* 2013; 52:670-681.

41  
42  
43 [32] IBM Corp. Released 2015. IBM SPSS Statistics for Windows, Version 23.0. Armonk,  
44  
45 NY: IBM Corp.

46  
47 [33] NVivo qualitative data analysis Software; QSR International Pty Ltd. Version 10, 2012.  
48  
49 Bowen S, Zwi AB (2005) Pathways to "evidence-informed" policy and practice: A  
50  
51 framework for action. *PLoS Med* 2(7): e166.  
52  
53  
54  
55  
56  
57  
58  
59  
60



1  
2  
3 [34] Lavis JN, Robertson D, Woodside JM, McLeod CB, Abelson J and the Knowledge  
4  
5 Transfer Study Group. How can research organizations more effectively transfer research  
6  
7 knowledge to decision makers? *The Milbank Quarterly* 2003;81(2):221-48.  
8

9  
10 [35] Young and Well Cooperative Research Centre. Youth Involvement Guidelines.

11 Available online at: <http://pandora.nla.gov.au/pan/141862/20160405->

12  
13 [1343/www.youngandwellcrc.org.au/wp-content/uploads/2014/04/0\\_Young-and-Well-CRC-](http://1343/www.youngandwellcrc.org.au/wp-content/uploads/2014/04/0_Young-and-Well-CRC-)

14  
15 [1343/www.youngandwellcrc.org.au/wp-content/uploads/2014/04/0\\_Young-and-Well-CRC-](http://1343/www.youngandwellcrc.org.au/wp-content/uploads/2014/04/0_Young-and-Well-CRC-)  
16 [Youth-Involvement-Guidelines\\_150414\\_RM\\_v4.1.pdf](http://1343/www.youngandwellcrc.org.au/wp-content/uploads/2014/04/0_Young-and-Well-CRC-). [Accessed 2 February 2017]  
17  
18  
19

## 20 21 **Figure Legends**

22  
23 Figure 1: *Access 3* design

24  
25 Figure 2: Questionnaire topic headings for Study 1

26  
27 Figure 3: Interview schedule headings for Study 2

28  
29 Figure 4: Interview schedule headings for Study 3  
30  
31  
32  
33  
34  
35  
36  
37  
38  
39  
40  
41  
42  
43  
44  
45  
46  
47  
48  
49  
50  
51  
52  
53  
54  
55  
56  
57  
58  
59  
60

1  
2  
3  
4  
5  
6  
7  
8  
9  
10  
11  
12  
13  
14  
15  
16  
17  
18  
19  
20  
21  
22  
23  
24  
25  
26  
27  
28  
29  
30  
31  
32  
33  
34  
35  
36  
37  
38  
39  
40  
41  
42  
43  
44  
45  
46  
47  
48  
49  
50  
51  
52  
53  
54  
55  
56  
57  
58  
59  
60

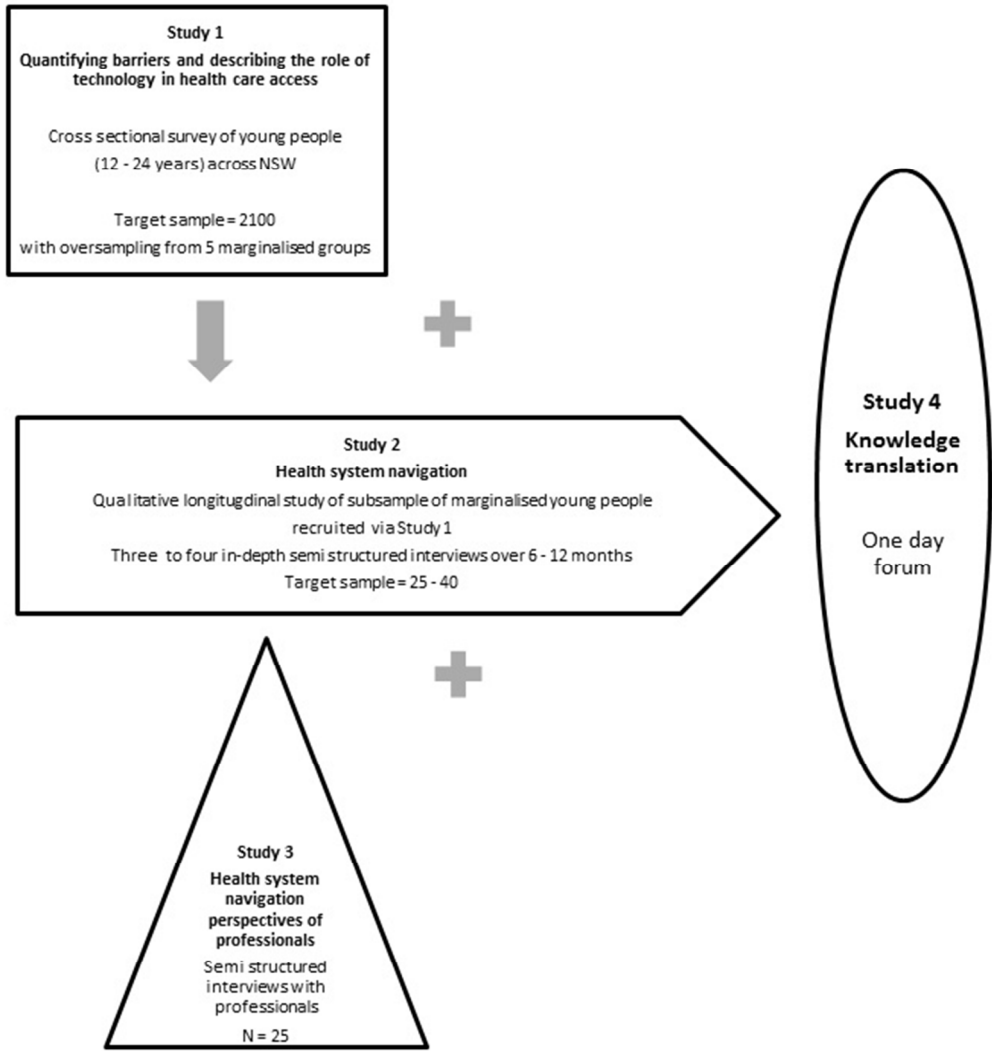

Figure 1: Access 3 design  
55x60mm (300 x 300 DPI)

1  
2  
3  
4  
5  
6  
7 **Figure 2: Questionnaire topic headings for Study 1**

8 **PARTS 1 – 3 About you**

9 Demographic information

10 Internet use

11 Identification as Aboriginal/ Torres Strait Islander, sexual identity, gender identity, intersex,  
12 refugee background

13 Education and employment

14 **PART 4 - 6 Accessing health care**

15 Attitudes to accessing health services

16 Experiences in past six months of accessing health services

17 Use of technology in accessing health information and health services

18 Barriers and facilitators to health care

19 **PART 7 Your health**

20 Self-rated health status

21 Chronic health conditions

22 Kessler-10 questionnaire

23 WHO-5 wellbeing questionnaire  
24  
25  
26  
27  
28  
29  
30  
31  
32  
33  
34  
35  
36  
37  
38  
39  
40  
41  
42  
43  
44  
45  
46  
47  
48  
49  
50  
51  
52  
53  
54  
55  
56  
57  
58  
59  
60

Figure 2: Questionnaire topic headings for Study 1

38x40mm (300 x 300 DPI)

1  
2  
3  
4  
5  
6  
7 **Figure 3: Interview schedule headings for Study 2**

8 Sources of information about health and about health care and accessing health information

9  
10 Experiences in past 3 – 6 months of health service visits (face to face and online) and  
11 hospitalisations

12 Role of technology in accessing health services

13  
14 Barriers and facilitators to health care and health system navigation

15  
16 Understandings of the 'health system'

17  
18 Suggestions for improvements to health services and the health system

19  
20 NB: at subsequent interviews these prompts guide the interview with a focus on experiences  
21 within the past 3 – 4 months

22  
23  
24  
25  
26  
27  
28  
29  
30  
31  
32  
33  
34  
35  
36  
37  
38 Figure 3: Interview schedule headings for Study 2

39  
40 38x40mm (300 x 300 DPI)

41  
42  
43  
44  
45  
46  
47  
48  
49  
50  
51  
52  
53  
54  
55  
56  
57  
58  
59  
60  
only

1  
2  
3  
4  
5  
6  
7 **Figure 4: Interview schedule headings for Study 3**

8 Perspectives on young people's access and health system navigation

9  
10 Health system present barriers and inefficiencies

11 Perspectives on marginalised young people's health access compared to other young people

12  
13 Perspectives on information provided to young people by the health system about being  
14 healthy and accessing services

15  
16 Suggestions for improvements to services and the health system generally

17  
18 Examples of initiatives of programs to support young people navigate the health system

19  
20  
21  
22  
23  
24  
25  
26  
27  
28  
29  
30  
31  
32  
33  
34  
35  
36  
37  
38  
39 Figure 4: Interview schedule headings for Study 3

40 38x40mm (300 x 300 DPI)
